# Supplementary material for: High-Pressure Processing for Cold Brew Coffee: Safety and Quality Assessment under Refrigerated and Ambient Storage
Source: MDPI journal article supplement (doi:10.3390/foods12234231), 2023-11-23
Supplement: s1 [file s1]

## Supplementary Data

**Table S1.** Commercial HPP cold-brew coffee brands around the world.

| Country   | Company           | Coffee Drinks                                               | Website                                                                                                   |
|-----------|-------------------|-------------------------------------------------------------|-----------------------------------------------------------------------------------------------------------|
| USA       | Back Bay Roasters | Black, latte                                                | <a href="https://www.backbayroasters.com/">https://www.backbayroasters.com/</a>                           |
|           | Happy Tree        | Blend with maple water                                      | <a href="https://drinkhappytree.com/">https://drinkhappytree.com/</a>                                     |
|           | Kokomio           | Blend with coconut water                                    | <a href="https://kokomio.com/flavors/cold-brew-coffee/">https://kokomio.com/flavors/cold-brew-coffee/</a> |
|           | Ludwig Coffee     | Black                                                       | <a href="https://ludwigcoffee.com/">https://ludwigcoffee.com/</a>                                         |
|           | MALK Organics     | Blend with pecan-based dairy alternative                    | <a href="https://malkorganics.com/">https://malkorganics.com/</a>                                         |
|           | Rebbl             | Black, mocha, blends with coconut                           | <a href="https://rebbl.co/">https://rebbl.co/</a>                                                         |
|           | Secret Squirrel   | Black, concentrate, dark chocolate mocha, latte, Vietnamese | <a href="https://www.squirrelbrew.com/">https://www.squirrelbrew.com/</a>                                 |
|           | Tulua             | Blend with date seed extract                                | <a href="https://www.drinktulua.com/">https://www.drinktulua.com/</a>                                     |
| Indonesia | Rejuve            | Latte, mocha, almond latte, almond mocha                    | <a href="https://www.rejuve.co.id/">https://www.rejuve.co.id/</a>                                         |

**Table S2.** Bacterial counts expressed as Log UFC/ml of unprocessed cold brew coffee stored at 4 °C or room temperature, and processed samples (600 MPa, 3 min) stored at 4 °C or room temperature during 90 days of storage.

| Parameter                 | Day of storage | Unprocessed |           | HPP       |           |
|---------------------------|----------------|-------------|-----------|-----------|-----------|
|                           |                | 4 °C        | 23 °C     | 4 °C      | 23 °C     |
| Total mesophilic bacteria | 0              | 1.3 ± 0.1   | 1.3 ± 0.0 | 1.0 ± 0.1 | 1.0 ± 0.2 |
|                           | 7              | 1.1 ± 0.2   | 0.9 ± 0.1 | 1.0 ± 0.2 | 0.8 ± 0.2 |
|                           | 14             | 0.8 ± 0.1   | 0.9 ± 0.2 | 1.0 ± 0.2 | 0.6 ± 0.3 |
|                           | 28             | 1.3 ± 0.4   | 0.9 ± 0.8 | 0.8 ± 0.1 | 1.3 ± 0.5 |
|                           | 60             | 0.8 ± 0.1   | 0.2 ± 0.3 | 0.4 ± 0.4 | ND        |
|                           | 90             | 1.1 ± 0.1   | 1.0 ± 0.6 | 0.7 ± 0.3 | 0.5 ± 0.2 |
| Yeast and molds           | 0              | <1          | <1        | 1.1 ± 0.2 | <1        |
|                           | 7              | <1          | <1        | <1        | 1.1 ± 0.2 |
|                           | 14             | <1          | <1        | <1        | <1        |
|                           | 28             | <1          | 1.1 ± 0.2 | <1        | <1        |
|                           | 60             | <1          | <1        | <1        | <1        |
|                           | 90             | <1          | <1        | <1        | <1        |
| <i>Enterobacteriaceae</i> | 0              | ND          | ND        | ND        | ND        |
|                           | 7              | ND          | ND        | ND        | ND        |
|                           | 14             | ND          | ND        | ND        | ND        |
|                           | 28             | ND          | ND        | ND        | ND        |
|                           | 60             | ND          | ND        | ND        | ND        |
|                           | 90             | ND          | ND        | ND        | ND        |

ND: not detected
